# Supplementary material for: Prediction of the need for intensive oxygen supplementation during the hospitalization among patients with COVID 19 admitted to an academic health system in Texas, USA: a retrospective cohort study and development of a multivariable regression model
Source: bioRxiv or medRxiv preprint supplement (doi:10.1101/2021.11.05.21265970), 2022-02-21
Supplement: Supplementary file [file media-1.pdf]

Supplemental Figure 1. Original cohort characteristics prior to exclusion, N = 352

|                               | WHO ordinal<br>scores <6<br>N =287 | WHO ordinal<br>scores 6-9<br>N =65 |           |
|-------------------------------|------------------------------------|------------------------------------|-----------|
|                               | N (%)                              |                                    | p- values |
| Symptoms                      |                                    |                                    |           |
| Cough                         | 147 (51.2)                         | 39 (60.0)                          | -         |
| Dyspnea                       | 150 (52.3)                         | 45 (69.2)                          |           |
| Rhinorrhea                    | 13 (4.5)                           | 5 (7.7)                            |           |
| Anosmia                       | 16 (5.6)                           | 3 (4.6)                            |           |
| Dysgeusia or<br>hypogeusia    | 27 (9.4%)                          | 9 (13.8)                           |           |
| Sore throat                   | 15 (5.2)                           | 4 (6.2)                            |           |
| Fever                         | 116 (40.4)                         | 36 (55.4)                          |           |
| Hemoptysis                    | 4 (1.4)                            | 0 (0)                              |           |
| Nausea and/or<br>vomiting     | 66 (23)                            | 10 (15.4)                          |           |
| Diarrhea                      | 54 (18.8)                          | 20 (30.8)                          |           |
| Myalgia and/or<br>arthritis   | 47 (16.4)                          | 11 (16.9)                          |           |
| Rash                          | 1 (0.3)                            | 0 (0)                              |           |
| Altered mental status         | 16 (5.6)                           | 5 (7.7)                            |           |
| Asymptomatic                  | 54 (18.8)                          | 4 (6.2)                            |           |
| Comorbidities                 |                                    |                                    |           |
| Cardiovascular                | 172 (59.9)                         | 41 (63.1)                          | -         |
| Diabetes mellitus             | 87 (30.3)                          | 24 (36.9)                          |           |
| Lung disease                  | 56 (19.5)                          | 8 (12.3)                           |           |
| Renal                         | 34 (11.8)                          | 6 (9.2)                            |           |
| Liver                         | 23 (8)                             | 10 (15.4)                          |           |
| HIV                           | 2 (0.7)                            | 2 (3.1)                            |           |
| Malignancy on<br>chemotherapy | 4 (1.4)                            | 1 (1.5)                            |           |
| Solid organ<br>transplant     | 6 (2.1)                            | 1 (1.5)                            |           |
| Dementia                      | 16 (5.6)                           | 3 (4.6)                            |           |
| Others                        | 46 (16.0)                          | 6 (9.2)                            |           |
| No known PMH                  | 35 (12.2)                          | 8 (12.3)                           |           |
| Campuses                      |                                    |                                    |           |
| Angleton                      | 22 (7.7)                           | 4 (6.2)                            | -         |
| League City                   | 44 (15.3)                          | 17 (26.2)                          |           |

|                    |            |           |      |
|--------------------|------------|-----------|------|
| Clear Lake         | 51 (17.8)  | 9 (13.8)  |      |
| Galveston          | 165 (57.5) | 32 (49.2) |      |
| Non UTMB transfers | 4 (1.4)    | 2 (3.1)   |      |
| Missing values     | 1 (0.3)    | 1 (1.5)   |      |
| Demographics       |            |           |      |
| Sex                |            |           |      |
| Male               | 165 (57.5) | 44 (67.7) | 0.17 |
| Female             | 122 (14.5) | 21 (32.3) |      |
| Code status        |            |           |      |
| Comfort care       | 8 (2.8)    | 10 (15.4) | -    |
| DNI                | 18 (6.3)   | 6 (9.2)   |      |
| Full code          | 261 (90.9) | 47 (72.3) |      |
| Missing values     | 0 (0)      | 2 (3.1)   |      |

| Clinical variables ** | Mean (+ SD)   |               | p- values |
|-----------------------|---------------|---------------|-----------|
| BMI                   | 31.4 (7.43)   | 33.9 (8.86)   | 0.0408    |
| O2 saturation, %      | 95.6 (6.58)   | 93.0 (5.62)   | 0.00133   |
| NLR                   | 5.69 (5.10)   | 9.92 (11.2)   | 0.00505   |
| CRP                   | 4.46 (7.62)   | 11.5 (10.2)   | < 0.001   |
| D-dimer               | 1.99 (7.86)   | 3.62 (16.6)   | 0.449     |
| qSOFA                 | 0.286 (0.475) | 0.569 (0.558) | <0.001    |
| LDH                   | 402 (418)     | 783 (559)     | <0.001    |
|                       | N (%)         |               | p- values |
| Categorical LDH       |               |               |           |
| Normal value          | 197 (68.6)    | 19 (29.2)     | <0.001    |
| 1-2 x ULN             | 77 (26.38)    | 30 (46.2)     |           |
| > 2 x ULN             | 13 (4.5)      | 14 (21.5)     |           |

\*\* 2 subjects in ordinal score 6-9 group had consistently missed values on clinical variables

Supplemental Figure 2. Initial regression model of cohort, N=329

| Parameter          | DF | Estimate | Standard Error | Wald Chi-Square | Pr > ChiSq |
|--------------------|----|----------|----------------|-----------------|------------|
| Intercept          | 1  | 229.0    | 99.3147        | 5.3166          | 0.0211     |
| Admission Date     | 1  | -0.0102  | 0.00451        | 5.1249          | 0.0236     |
| Biological Sex     | 1  | 0.5877   | 1.7130         | 0.1177          | 0.7315     |
| Age                | 1  | -0.00041 | 0.0597         | 0.0000          | 0.9946     |
| Biological Sex*Age | 1  | -0.0130  | 0.0257         | 0.2566          | 0.6124     |
| BMI                | 1  | -0.0468  | 0.1064         | 0.1936          | 0.6599     |
| BMI*Age            | 1  | 0.00203  | 0.00166        | 1.5088          | 0.2193     |
| Admission SpO2     | 1  | -0.0963  | 0.0439         | 4.8183          | 0.0282     |
| Neut./Lymph. Ratio | 1  | 0.0762   | 0.0288         | 6.9776          | 0.0083     |
| Procalcitonin      | 1  | 0.2200   | 0.5481         | 0.1612          | 0.6881     |
| Admission D-Dimer  | 1  | -0.0204  | 0.0137         | 2.2070          | 0.1374     |
| LDH                | 1  | 1.1513   | 0.2995         | 14.7743         | 0.0001     |
| CRP                | 1  | 0.2342   | 0.4337         | 0.2917          | 0.5891     |
| qSOFA Score        | 1  | 0.8852   | 0.3196         | 7.6689          | 0.0056     |

\*Note that complete case exclusion not applied for this table

Supplemental Figure 3. DNI Sensitivity Analysis

| <b>Odds Ratio Estimates</b> |                       |                                   |       |
|-----------------------------|-----------------------|-----------------------------------|-------|
| <b>Effect</b>               | <b>Point Estimate</b> | <b>95% Wald Confidence Limits</b> |       |
| <b>Age</b>                  | 1.044                 | 1.020                             | 1.069 |
| <b>BMI</b>                  | 1.082                 | 1.034                             | 1.133 |
| <b>Admission SpO2</b>       | 0.907                 | 0.834                             | 0.987 |
| <b>Admission Date</b>       | 0.989                 | 0.981                             | 0.998 |
| <b>Neut./Lymph. Ratio</b>   | 1.078                 | 1.023                             | 1.137 |
| <b>Admission D-Dimer</b>    | 0.979                 | 0.954                             | 1.005 |
| <b>LDH</b>                  | 3.379                 | 2.043                             | 5.588 |
| <b>qSOFA Score</b>          | 2.240                 | 1.218                             | 4.118 |
