# Supplementary material for: Prediction of the need for intensive oxygen supplementation during the hospitalization among patients with COVID 19 admitted to an academic health system in Texas, USA: a retrospective cohort study and development of a multivariable regression model
Source: bioRxiv or medRxiv preprint supplement (doi:10.1101/2021.11.05.21265970), 2022-02-21
Supplement: Supplementary file [file media-1.pdf]

**Supplemental Table A. Variable of Interest List**

|                      |                                                                                                                                                                                                                                                                                                                                                                                                                                                                                                                                                                                                                                                 |
|----------------------|-------------------------------------------------------------------------------------------------------------------------------------------------------------------------------------------------------------------------------------------------------------------------------------------------------------------------------------------------------------------------------------------------------------------------------------------------------------------------------------------------------------------------------------------------------------------------------------------------------------------------------------------------|
| <b>Demographics</b>  | Date of Birth<br>Sex<br>Body Mass Index (BMI)<br>Admission Campus                                                                                                                                                                                                                                                                                                                                                                                                                                                                                                                                                                               |
| <b>Clinical data</b> | Discharge status<br>Discharge date<br>Date of death<br>Do not intubate (DNI) status<br>First Vitals<br>Presenting symptoms<br>Symptom duration<br>Comorbidities (diabetes mellitus, cardiovascular, pulmonary, and kidney disease)<br>Oxygen supplementation modality (if any)<br>Oxygen flow requirements.<br>Glasgow coma scale (GCS) < 15 vs = 15 (disorientation or other indication from clinical note)<br>Systolic blood pressure, Respiratory Rate, and GCS were used to calculate the Quick Sequential Organ Failure Assessment (qSOFA).                                                                                                |
| <b>Comorbidities</b> | <p>Cardiovascular diseases included:<br/>Hypertension<br/>Coronary artery disease<br/>Heart failure<br/>History of cardiac resynchronization device placement or left ventricular assisting device placement</p> <p>Lung diseases included:<br/>Asthma<br/>Chronic Obstructive Airway Disease<br/>Pulmonary hypertension<br/>Obstructive sleep apnea<br/>Interstitial lung disease<br/>Use of home oxygen<br/>Use of home continuous positive airway pressure (CPAP) or bilevel positive airway pressure (BiPAP).</p> <p>Chronic kidney disease included:<br/>Any stage 1-5 or end stage renal disease requiring renal replacement therapy.</p> |

**Supplemental Figure 1. Original cohort characteristics prior to exclusion, N = 352**

|                               | WHO ordinal<br>scores <6<br>N =287 | WHO ordinal<br>scores 6-9<br>N =65 |           |
|-------------------------------|------------------------------------|------------------------------------|-----------|
|                               | N (%)                              |                                    | p- values |
| Symptoms                      |                                    |                                    |           |
| Cough                         | 147 (51.2)                         | 39 (60.0)                          | -         |
| Dyspnea                       | 150 (52.3)                         | 45 (69.2)                          |           |
| Rhinorrhea                    | 13 (4.5)                           | 5 (7.7)                            |           |
| Anosmia                       | 16 (5.6)                           | 3 (4.6)                            |           |
| Dysgeusia or<br>hypogeusia    | 27 (9.4%)                          | 9 (13.8)                           |           |
| Sore throat                   | 15 (5.2)                           | 4 (6.2)                            |           |
| Fever                         | 116 (40.4)                         | 36 (55.4)                          |           |
| Hemoptysis                    | 4 (1.4)                            | 0 (0)                              |           |
| Nausea and/or<br>vomiting     | 66 (23)                            | 10 (15.4)                          |           |
| Diarrhea                      | 54 (18.8)                          | 20 (30.8)                          |           |
| Myalgia and/or<br>arthritis   | 47 (16.4)                          | 11 (16.9)                          |           |
| Rash                          | 1 (0.3)                            | 0 (0)                              |           |
| Altered mental status         | 16 (5.6)                           | 5 (7.7)                            |           |
| Asymptomatic                  | 54 (18.8)                          | 4 (6.2)                            |           |
| Comorbidities                 |                                    |                                    |           |
| Cardiovascular                | 172 (59.9)                         | 41 (63.1)                          | -         |
| Diabetes mellitus             | 87 (30.3)                          | 24 (36.9)                          |           |
| Lung disease                  | 56 (19.5)                          | 8 (12.3)                           |           |
| Renal                         | 34 (11.8)                          | 6 (9.2)                            |           |
| Liver                         | 23 (8)                             | 10 (15.4)                          |           |
| HIV                           | 2 (0.7)                            | 2 (3.1)                            |           |
| Malignancy on<br>chemotherapy | 4 (1.4)                            | 1 (1.5)                            |           |
| Solid organ<br>transplant     | 6 (2.1)                            | 1 (1.5)                            |           |
| Dementia                      | 16 (5.6)                           | 3 (4.6)                            |           |
| Others                        | 46 (16.0)                          | 6 (9.2)                            |           |
| No known PMH                  | 35 (12.2)                          | 8 (12.3)                           |           |
| Campuses                      |                                    |                                    |           |
| Angleton                      | 22 (7.7)                           | 4 (6.2)                            | -         |
| League City                   | 44 (15.3)                          | 17 (26.2)                          |           |

|                    |            |           |      |
|--------------------|------------|-----------|------|
| Clear Lake         | 51 (17.8)  | 9 (13.8)  |      |
| Galveston          | 165 (57.5) | 32 (49.2) |      |
| Non UTMB transfers | 4 (1.4)    | 2 (3.1)   |      |
| Missing values     | 1 (0.3)    | 1 (1.5)   |      |
| Demographics       |            |           |      |
| Sex                |            |           |      |
| Male               | 165 (57.5) | 44 (67.7) | 0.17 |
| Female             | 122 (14.5) | 21 (32.3) |      |
| Code status        |            |           |      |
| Comfort care       | 8 (2.8)    | 10 (15.4) | -    |
| DNI                | 18 (6.3)   | 6 (9.2)   |      |
| Full code          | 261 (90.9) | 47 (72.3) |      |
| Missing values     | 0 (0)      | 2 (3.1)   |      |

| Clinical variables ** | Mean (+ SD)   |               | p- values |
|-----------------------|---------------|---------------|-----------|
| BMI                   | 31.4 (7.43)   | 33.9 (8.86)   | 0.0408    |
| O2 saturation, %      | 95.6 (6.58)   | 93.0 (5.62)   | 0.00133   |
| NLR                   | 5.69 (5.10)   | 9.92 (11.2)   | 0.00505   |
| CRP                   | 4.46 (7.62)   | 11.5 (10.2)   | < 0.001   |
| D-dimer               | 1.99 (7.86)   | 3.62 (16.6)   | 0.449     |
| qSOFA                 | 0.286 (0.475) | 0.569 (0.558) | <0.001    |
| LDH                   | 402 (418)     | 783 (559)     | <0.001    |
|                       | N (%)         |               | p- values |
| Categorical LDH       |               |               |           |
| Normal value          | 197 (68.6)    | 19 (29.2)     | <0.001    |
| 1-2 x ULN             | 77 (26.38)    | 30 (46.2)     |           |
| > 2 x ULN             | 13 (4.5)      | 14 (21.5)     |           |

\*\* 2 subjects in ordinal score 6-9 group had consistently missed values on clinical variables

Supplemental Figure 2. Initial regression model of cohort, N=329

| <b>Analysis of Maximum Likelihood Estimates</b> |           |                 |                 |                   |                       |
|-------------------------------------------------|-----------|-----------------|-----------------|-------------------|-----------------------|
| <b>Parameter</b>                                | <b>DF</b> | <b>Estimate</b> | <b>Standard</b> | <b>Wald</b>       | <b>Pr &gt; Chi Sq</b> |
|                                                 |           |                 | <b>Error</b>    | <b>Chi-Square</b> |                       |
| <b>Intercept</b>                                | 1         | 3.18E+55        | 1.97092E+47     | 1.3761            | 0.2408                |
| <b>Sex</b>                                      | 1         | 0.918237        | 6.234510078     | 0.0022            | 0.9628                |
| <b>Age</b>                                      | 1         | 0.985309        | 1.066838925     | 0.0521            | 0.8195                |
| <b>Sex*Age</b>                                  | 1         | 0.991982        | 1.028910011     | 0.0797            | 0.7777                |
| <b>Admission Date</b>                           | 1         | 0.994326        | 1.004952222     | 1.3234            | 0.25                  |
| <b>BMI</b>                                      | 1         | 0.945066        | 1.119743902     | 0.2499            | 0.6171                |
| <b>Age*BMI</b>                                  | 1         | 1.002062        | 1.001881768     | 1.2095            | 0.2714                |
| <b>Admission SpO2</b>                           | 1         | 0.930345        | 1.052638638     | 1.9798            | 0.1594                |
| <b>Duration Sx</b>                              | 1         | 0.947432        | 1.106276642     | 0.2857            | 0.593                 |
| <b>Admit NLR</b>                                | 1         | 1.178686        | 1.064281581     | 6.9766            | 0.0083                |
| <b>Admit Procalcitonin</b>                      | 1         | 0.835939        | 1.566587991     | 0.1594            | 0.6897                |
| <b>Admit D-Dimer</b>                            | 1         | 0.938943        | 1.046341715     | 1.9368            | 0.164                 |
| <b>Admit LDH</b>                                | 1         | 2.308505        | 1.372179017     | 6.993             | 0.0082                |
| <b>Admit CRP</b>                                | 1         | 1.807058        | 1.546354152     | 1.8428            | 0.1746                |
| <b>qSOFA</b>                                    | 1         | 2.932338        | 1.429178781     | 9.0749            | 0.0026                |

\*Note that complete case exclusion not applied for this table

Supplemental Figure 3. Stratified BMI Analysis

| Analysis of Maximum Likelihood Estimates |    |          |          |            |             |
|------------------------------------------|----|----------|----------|------------|-------------|
| Parameter                                | DF | Estimate | Standard | Wald       | Pr > Chi Sq |
|                                          |    |          | Error    | Chi-Square |             |
| Intercept                                | 1  | 0.000554 | 6.30599  | 16.5798    | <.0001      |
| Age                                      | 1  | 1.032931 | 1.019284 | 2.8751     | 0.09        |
| Admit NLR                                | 1  | 1.190294 | 1.09319  | 3.8177     | 0.0507      |
| Admit LDH                                | 1  | 5.452641 | 1.594085 | 13.2276    | 0.0003      |

Lower BMI Analysis (BMI <30)

| Analysis of Maximum Likelihood Estimates |    |            |           |            |             |
|------------------------------------------|----|------------|-----------|------------|-------------|
| Parameter                                | DF | Estimate   | Standard  | Wald       | Pr > Chi Sq |
|                                          |    |            | Error     | Chi-Square |             |
| Intercept                                | 1  | 7.73534434 | 204.95696 | 0.1477     | 0.7007      |
| Sex                                      | 1  | 0.32184024 | 1.6594729 | 5.0094     | 0.0252      |
| Age                                      | 1  | 1.05812661 | 1.0196914 | 8.401      | 0.0038      |
| BMI                                      | 1  | 1.06822672 | 1.0338607 | 3.9238     | 0.0476      |
| Admit SpO2                               | 1  | 0.90429468 | 1.054746  | 3.5653     | 0.059       |
| Admit NLR                                | 1  | 1.16602438 | 1.0778842 | 4.1962     | 0.0405      |
| Admit D-Dimer                            | 1  | 0.65422758 | 1.215311  | 4.736      | 0.0295      |
| Admit LDH                                | 1  | 2.40873087 | 1.4663847 | 5.2744     | 0.0216      |
| Admit CRP                                | 1  | 2.86967849 | 1.708473  | 3.8735     | 0.0491      |

Higher BMI Analysis (BMI => 30)

Supplemental Figure 4. DNI Sensitivity Analysis

| <b>Analysis of Maximum Likelihood Estimates</b> |           |                 |                 |                   |                       |
|-------------------------------------------------|-----------|-----------------|-----------------|-------------------|-----------------------|
| <b>Parameter</b>                                | <b>DF</b> | <b>Estimate</b> | <b>Standard</b> | <b>Wald</b>       | <b>Pr &gt; Chi Sq</b> |
|                                                 |           |                 | <b>Error</b>    | <b>Chi-Square</b> |                       |
| <b>Intercept</b>                                | 1         | 77.2154835      | 175.3002        | 0.7078            | 0.4002                |
| <b>Age</b>                                      | 1         | 0.97384804      | 1.051061        | 0.2828            | 0.5949                |
| <b>BMI</b>                                      | 1         | 0.93304672      | 1.104839        | 0.4836            | 0.4868                |
| <b>Age*BMI</b>                                  | 1         | 1.00215231      | 1.001561        | 1.8954            | 0.1686                |
| <b>Admit SpO2</b>                               | 1         | 0.92154838      | 1.043312        | 3.7208            | 0.0537                |
| <b>Admit NLR</b>                                | 1         | 1.07422557      | 1.026238        | 7.66              | 0.0056                |
| <b>Admit D-Dimer</b>                            | 1         | 0.98049278      | 1.01349         | 2.1498            | 0.1426                |
| <b>Admit LDH</b>                                | 1         | 3.46668914      | 1.288785        | 24.006            | <.0001                |
| <b>qSOFA</b>                                    | 1         | 2.37049786      | 1.370533        | 7.5001            | 0.0062                |
